# Supplementary material for: Walking a mile in their patients' shoes: empathy and othering in medical students' education
Source: Springer Nature journal article supplement (doi:10.1186/1747-5341-3-10), 2008-01-01
Supplement: 13010_2008_55_MOESM1_ESM.pdf [file 13010_2008_55_MOESM1_ESM.pdf]

# "Helping" sick other

Expected  
"Professional"  
response

Drawing Closer to  
Others:  
(altruism)

Intended  
Outcome

*Narrative, biopsychosocial,  
patient-centered medicine*

Ethics of  
Imperfection

Key Underlying Mechanism  
Empathy: mutual  
recognition

*Philosophical Foundation*  
(Eastern thought): post-  
modernism, acceptance of  
uncertainty, limited control,  
shared vulnerability

"Unprofessional"  
response

Withdrawing  
from Others  
(Othering)

Unintended  
Outcome

*Logico-scientific, modernist  
medicine*

Key Underlying Mechanism  
Fear: vulnerability,  
contamination (by  
imperfection, pain, death)

*Philosophical Foundation*  
(Western thought): dualism,  
positivism, objectivism,  
reductionism, control, mastery

Scape-goating
